# Supplementary material for: Factors Associated With Psychiatric Readmission of Youths in a Racially Diverse and Urban Hospital Setting
Source: Atypon-hosted journal article supplement (doi:10.1176/appi.ps.202100389), 2022-08-25
Supplement: appi.ps.202100389.ds001.pdf [file appi.ps.202100389.ds001.pdf]

## Data Extracted

Using each patient's first/earliest hospitalization in our dataset, we extracted the following *patient demographic information* from the electronic health record (EHR): child age in years (recoded as 4-12 years vs. 13 and over to coincide with typical hospital unit age distinctions), race (fixed-choice options in EHR based on patient/family self-report at registration: Black, Caucasian (i.e., White), Hispanic/Latino, Asian, Other/Unknown [including 1 who identified as American Indian]), primary language (English, Spanish, other [Mandarin, Vietnamese, American Sign Language]), and insurance type. Values were present for all variables. The name of a patient's insurance company was coded in the EHR and subsequently cross-referenced against an institutional payor table to categorize it as one of the following insurance types: Commercial, Medicaid, TRICARE (a program for uniformed service members and families), Self-Insured, or Other (unable to categorize insurance type based on payor listed).

The following *clinical information* about each patient's earliest hospitalization was also extracted: length of stay in days (recoded as 0-7 vs. more than 7 given distribution: M=7.2, SD=6.4) and ICD-10-CM diagnostic codes. Authors with clinical expertise recoded the ICD-10-CM codes to identify 1) whether suicidality was present in the ICD-10-CM code list and 2) to categorize the primary admission diagnosis. For suicidality, admissions were coded as either suicidality not present (no ICD-10-CM code related to suicidality), suicidal ideation only (e.g., R45.851, "suicidal ideations" without additional suicide attempt codes), or suspected suicide attempt with or without ideation (e.g., T14.91XA, "suicide attempt, initial encounter"; T39.312A, "poisoning by propionic acid derivatives, intentional self-harm, initial encounter"). To categorize primary diagnoses, authors with clinical expertise created diagnostic categories of ICD-10-CM codes to align with the *DSM-5*. The patient's first listed (i.e., primary) mental health

diagnosis (ICD-10-CM F-code ranging from F01-F99) was used to assign the patient's admission to a diagnostic category (see Table 1 for characteristics of study sample and Table 2 for diagnostic categories). There were no exclusion criteria based on the manner of admission to the inpatient psychiatric unit (i.e., data includes all admissions including from the emergency department, medical floors, and direct admits),

Note that due to small sub-sample sizes and given comparable rates of readmission, the following categories were combined for multivariate analyses: 'Asian' (1.3%, n=21) and 'Other/Unknown' (1.3%, n=21) were combined into 'Other' race; 'Commercial' (35.3%, n=566), and 'Other' (2.1%, n=33) became the reference group for insurance type.

**Table 1. Demographic Characteristics.**

|                                                                                                          | <b>% of full sample (N=1604)</b> | <b>n</b> | <b>% who were readmitted within 1 year</b> | <b>n</b> | <b>Chi-2</b> |
|----------------------------------------------------------------------------------------------------------|----------------------------------|----------|--------------------------------------------|----------|--------------|
| Age                                                                                                      |                                  |          |                                            |          | 1.5          |
| 4 -12 years old                                                                                          | 32.8                             | 526      | 17.1                                       | 90       |              |
| 13 years and older                                                                                       | 67.2                             | 1078     | 14.7                                       | 159      |              |
| Race                                                                                                     |                                  |          |                                            |          | 16.6***      |
| Black                                                                                                    | 59.2                             | 948      | 18.4                                       | 174      |              |
| White                                                                                                    | 18.3                             | 293      | 9.2                                        | 27       |              |
| Hispanic/Latino                                                                                          | 20                               | 321      | 13.7                                       | 44       |              |
| Other/Unknown                                                                                            | 2.6                              | 42       | 9.5                                        | 4        |              |
| Language                                                                                                 |                                  |          |                                            |          | 0.62         |
| English                                                                                                  | 87.7                             | 1407     | 15.7                                       | 221      |              |
| Spanish                                                                                                  | 12                               | 192      | 14.1                                       | 27       |              |
| Other                                                                                                    | 0.2                              | 4        | 25                                         | 1        |              |
| Insurance Type                                                                                           |                                  |          |                                            |          | 17.2***      |
| Commercial/other                                                                                         | 37.4                             | 599      | 11.9                                       | 71       |              |
| Medicaid                                                                                                 | 60.6                             | 972      | 18.3                                       | 178      |              |
| Self-insured                                                                                             | 1.8                              | 29       | 0                                          | 0        |              |
| Length of Stay                                                                                           |                                  |          |                                            |          | 9.4**        |
| 0-7 days                                                                                                 | 69.6                             | 1117     | 13.7                                       | 153      |              |
| > 7 days                                                                                                 | 30.4                             | 487      | 19.7                                       | 96       |              |
| Suicidality                                                                                              |                                  |          |                                            |          | 3.1          |
| None                                                                                                     | 50.2                             | 806      | 16.1                                       | 130      |              |
| Ideation only                                                                                            | 35.7                             | 573      | 16.2                                       | 93       |              |
| Attempt                                                                                                  | 14                               | 225      | 11.6                                       | 26       |              |
| Primary Psychiatric Diagnosis Category                                                                   |                                  |          |                                            |          | 4.1          |
| Anxiety and related disorders                                                                            | 6.2                              | 99       | 14.6                                       | 14       |              |
| Mood (e.g., depressive and bipolar) disorders                                                            | 64.5                             | 1035     | 16.3                                       | 169      |              |
| Disruptive behavioral disorders                                                                          | 5.4                              | 87       | 19.5                                       | 17       |              |
| Neurodevelopmental disorders (e.g., ASD, ADHD)                                                           | 10.5                             | 168      | 13.1                                       | 22       |              |
| Psychotic disorders                                                                                      | 3.1                              | 49       | 14.3                                       | 7        |              |
| Trauma- or stressor-related disorders                                                                    | 7.5                              | 120      | 12.5                                       | 15       |              |
| Other (feeding, medically related, somatic, dissociative, substance, unspecified, and unknown) disorders | 2.9                              | 46       | 10.9                                       | 5        |              |

**Table 2. Primary Psychiatric Diagnosis Categorization Using ICD-10-CM Codes**

| <b>Diagnostic Categorization</b>                                                                     | <b>ICD-10-CM Codes</b>                                            | <b>Descriptor of ICD-10-CM Codes</b>                                                                                                                                                                                                                                                               | <b>Categorization Notes</b>                                                                                                                                                                                                                                          |
|------------------------------------------------------------------------------------------------------|-------------------------------------------------------------------|----------------------------------------------------------------------------------------------------------------------------------------------------------------------------------------------------------------------------------------------------------------------------------------------------|----------------------------------------------------------------------------------------------------------------------------------------------------------------------------------------------------------------------------------------------------------------------|
| Psychotic disorders (n=49)                                                                           | F20-F29                                                           | Schizophrenia, schizotypal, delusional, and other non-mood psychotic disorders                                                                                                                                                                                                                     |                                                                                                                                                                                                                                                                      |
| Mood (e.g., depressive and bipolar) disorders (n=1035)                                               | F30-F39                                                           | Mood [affective] disorders                                                                                                                                                                                                                                                                         |                                                                                                                                                                                                                                                                      |
| Anxiety and related disorders (n=99)                                                                 | F40-F48, F93-F93.9, F94.0, F95.0-F95.9                            | Anxiety, dissociative, stress-related, somatoform and other nonpsychotic mental disorders                                                                                                                                                                                                          | No primary dissociative or somatoform disorders identified<br>Recategorize: F43-F43.9, Trauma                                                                                                                                                                        |
| Trauma or stressor-related disorders (n=120)                                                         | F43-F43.9, F94.1, F94.2                                           | Trauma or stressor-related disorders                                                                                                                                                                                                                                                               |                                                                                                                                                                                                                                                                      |
| Neurodevelopmental (e.g., ASD, ADHD) disorders (n=168)                                               | F70-F79, F80-F89, F90-F90.9                                       | Intellectual disabilities<br>Pervasive and specific developmental or neurodevelopmental disorders                                                                                                                                                                                                  | No primary intellectual disability diagnoses identified                                                                                                                                                                                                              |
| Disruptive and/or behavioral disorders (n=87)                                                        | F91-F98, F63-F63.9                                                | Behavioral and emotional disorders with onset usually occurring in childhood and adolescence                                                                                                                                                                                                       | Recategorize: F90-F90.9, Neurodevelopmental<br>Recategorize: F93-F93.9, Anxiety<br>Recategorize: F94.0, Anxiety<br>Recategorize: F94.1, F94.2, Trauma<br>Recategorize: F94.8, F94.9, Other<br>Recategorize: F95.0-F95.9, Anxiety<br>Recategorize: F98.0-F98.9, Other |
| Other (feeding, medically related, somatic, dissociative, unspecified, and unknown) disorders (n=46) | F01-F09, F10-F19, F50-F59, F60-F69, F99, F94.8-F94.9, F98.0-F98.9 | Mental disorders due to known physiological conditions<br>Mental and behavioral disorders due to psychoactive substance use<br>Behavioral syndromes associated with physiological disturbances and physical factors<br>Disorders of adult personality and behavior<br>Unspecified mental disorders | Recategorize: F63-F63.9, Disruptive                                                                                                                                                                                                                                  |

**Table 3. Estimated Odds Ratios for Multivariate Logistic Regression Model of Any Readmission within 1 Year, by Significant Demographic and Clinical Factors**

| Variable                                      | Any Readmission within 1 Year |           |          |
|-----------------------------------------------|-------------------------------|-----------|----------|
|                                               | AOR                           | 95% CI    | <i>p</i> |
| Race (reference: White)                       |                               |           |          |
| Black                                         | 1.90                          | 1.19–3.04 | 0.007    |
| Hispanic                                      | 1.39                          | 0.81–2.40 | 0.24     |
| Other/Unknown                                 | 1.02                          | 0.34–3.11 | 0.97     |
| Insurance type (reference: Commercial, other) |                               |           |          |
| Medicaid                                      | 1.40                          | 1.01–1.94 | 0.04     |
| Self-pay                                      | 0                             | 0         | 1        |
| Length of stay (reference: 0–7 days)          |                               |           |          |
| >7 days                                       | 1.58                          | 1.19–2.10 | 0.002    |

**Table 4. Estimated Odds Ratio for Random Effects Multinomial Logistic Regression Model of Readmissions within One Year, by Significant Demographic and Clinical Factors**

|                                               | Readmitted Once vs. None |           |          | Readmitted More than Once vs. None |           |          | Readmitted Once vs. More Than Once |           |          |
|-----------------------------------------------|--------------------------|-----------|----------|------------------------------------|-----------|----------|------------------------------------|-----------|----------|
|                                               | AOR                      | 95% CI    | <i>p</i> | AOR                                | 95% CI    | <i>p</i> | AOR                                | 95% CI    | <i>p</i> |
| Race (reference: White)                       |                          |           |          |                                    |           |          |                                    |           |          |
| Black                                         | 1.70                     | 1.0-2.88  | 0.05     | 2.50                               | 1.0-6.26  | 0.05     | 0.68                               | 0.24-1.91 | 0.46     |
| Hispanic/Latino                               | 1.56                     | 0.85-2.86 | 0.15     | 0.96                               | 0.31-2.98 | 0.95     | 1.62                               | 0.46-5.68 | 0.45     |
| Other/Unknown                                 | 1.35                     | 0.44-4.19 | 0.60     | 0                                  | 0         | 1.0      | -                                  | -         | -        |
| Insurance type (reference: Commercial, other) |                          |           |          |                                    |           |          |                                    |           |          |
| Medicaid                                      | 1.23                     | 0.85-1.79 | 0.27     | 1.92                               | 1.04-3.53 | 0.04     | 0.64                               | 0.32-1.28 | 0.64     |
| Self-pay                                      | 0                        | 0         | 1.0      | 0                                  | 0         | -        | 0.52                               | 0         | 0.52     |
| Length of stay (reference: 0-7 days)          |                          |           |          |                                    |           |          |                                    |           |          |
| >7 days                                       | 1.43                     | 1.03-2.0  | 0.04     | 1.92                               | 1.19-3.09 | 0.01     | 0.75                               | 0.43-1.30 | 0.75     |
